# Supplementary material for: Educational and Psychological Support Combined with Minimally Invasive Surgical Technique Reduces Perioperative Depression and Anxiety in Patients with Bladder Cancer Undergoing Radical Cystectomy
Source: MDPI journal article supplement (doi:10.3390/ijerph182413071), 2021-12-11
Supplement: s1 [file s1]

| Analysis of clinical factors associated with borderline or abnormal preoperative feeling of anxiety in HADS     |             |                            |                 |                          |                          |       |        |                 |                 |
|-----------------------------------------------------------------------------------------------------------------|-------------|----------------------------|-----------------|--------------------------|--------------------------|-------|--------|-----------------|-----------------|
|                                                                                                                 | coefficient | standard error coefficient | Wald chi-square | lower 95% CI coefficient | upper 95% CI coefficient | p     | OR     | lower 95% CI OR | upper 95% CI OR |
| Intercept                                                                                                       | 0,877       | 0,579                      | 2,292           | -0,258                   | 2,013                    | 0,130 | 2,404  | 0,772           | 7,482           |
| Cystocare meeting (no vs yes)                                                                                   | -0,631      | 0,500                      | 1,594           | -1,610                   | 0,348                    | 0,207 | 0,532  | 0,200           | 1,417           |
| Marital status (single vs married)                                                                              | -0,428      | 0,468                      | 0,835           | -1,345                   | 0,490                    | 0,361 | 0,652  | 0,261           | 1,632           |
| Gender (male vs female)                                                                                         | 0,461       | 0,519                      | 0,789           | -0,556                   | 1,477                    | 0,375 | 1,585  | 0,574           | 4,380           |
| Age (≤65 vs > 65)                                                                                               | 0,140       | 0,482                      | 0,084           | -0,805                   | 1,085                    | 0,772 | 1,150  | 0,447           | 2,959           |
| Surgical approach (open vs laparoscopic)                                                                        | -1,008      | 0,503                      | 4,015           | -1,994                   | -0,022                   | 0,045 | 0,365  | 0,136           | 0,978           |
| AUC                                                                                                             | 0.688       |                            |                 |                          |                          |       |        |                 |                 |
| AUC error                                                                                                       | 0.0569      |                            |                 |                          |                          |       |        |                 |                 |
| Hosmer Lemeshow test (p value)                                                                                  | 0.969       |                            |                 |                          |                          |       |        |                 |                 |
| Analysis of clinical factors associated with borderline or abnormal preoperative feeling of depression in HADS  |             |                            |                 |                          |                          |       |        |                 |                 |
|                                                                                                                 | coefficient | standard error coefficient | Wald chi-square | lower 95% CI coefficient | upper 95% CI coefficient | p     | OR     | lower 95% CI OR | upper 95% CI OR |
| Intercept                                                                                                       | 0,455       | 0,559                      | 0,662           | -0,641                   | 1,550                    | 0,416 | 1,575  | 0,527           | 4,710           |
| Cystocare meeting (no vs yes)                                                                                   | -0,454      | 0,500                      | 0,825           | -1,435                   | 0,526                    | 0,364 | 0,635  | 0,238           | 1,692           |
| Marital status (single vs married)                                                                              | -0,547      | 0,458                      | 1,428           | -1,445                   | 0,350                    | 0,232 | 0,579  | 0,236           | 1,420           |
| Gender (male vs female)                                                                                         | 0,083       | 0,514                      | 0,026           | -0,924                   | 1,091                    | 0,871 | 1,087  | 0,397           | 2,976           |
| Age (≤65 vs > 65)                                                                                               | 0,038       | 0,476                      | 0,006           | -0,896                   | 0,972                    | 0,937 | 1,038  | 0,408           | 2,642           |
| Surgical approach (open vs laparoscopic)                                                                        | -0,566      | 0,488                      | 1,346           | -1,523                   | 0,390                    | 0,246 | 0,568  | 0,218           | 1,478           |
| AUC                                                                                                             | 0.629       |                            |                 |                          |                          |       |        |                 |                 |
| AUC error                                                                                                       | 0.0618      |                            |                 |                          |                          |       |        |                 |                 |
| Hosmer Lemeshow test (p value)                                                                                  | 0.199       |                            |                 |                          |                          |       |        |                 |                 |
| Analysis of clinical factors associated with borderline or abnormal postoperative feeling of anxiety in HADS    |             |                            |                 |                          |                          |       |        |                 |                 |
|                                                                                                                 | coefficient | standard error coefficient | Wald chi-square | lower 95% CI coefficient | upper 95% CI coefficient | p     | OR     | lower 95% CI OR | upper 95% CI OR |
| Intercept                                                                                                       | -0,814      | 0,785                      | 1,074           | -2,352                   | 0,725                    | 0,300 | 0,443  | 0,095           | 2,065           |
| Cystocare meeting (no vs yes)                                                                                   | -1,044      | 0,575                      | 3,295           | -2,171                   | 0,083                    | 0,069 | 0,352  | 0,114           | 1,087           |
| Marital status (single vs married)                                                                              | 0,210       | 0,501                      | 0,176           | -0,772                   | 1,192                    | 0,675 | 1,234  | 0,462           | 3,292           |
| Hospital stay (≤7 vs >7)                                                                                        | 1,050       | 0,560                      | 3,510           | -0,048                   | 2,148                    | 0,061 | 2,857  | 0,953           | 8,568           |
| Gender (male vs female)                                                                                         | 0,572       | 0,554                      | 1,067           | -0,513                   | 1,657                    | 0,302 | 1,772  | 0,598           | 5,246           |
| Age (≤65 vs > 65)                                                                                               | -0,263      | 0,527                      | 0,249           | -1,296                   | 0,771                    | 0,618 | 0,769  | 0,274           | 2,161           |
| Surgical approach (open vs laparoscopic)                                                                        | 0,090       | 0,557                      | 0,026           | -1,003                   | 1,182                    | 0,872 | 1,094  | 0,367           | 3,261           |
| Urinary diversion (ureterocutaneostomy vs ileal conduit)                                                        | 0,450       | 0,524                      | 0,737           | -0,577                   | 1,477                    | 0,391 | 1,568  | 0,562           | 4,378           |
| Complications grade (≤2 vs >2)                                                                                  | -0,355      | 0,657                      | 0,292           | -1,642                   | 0,932                    | 0,589 | 0,701  | 0,194           | 2,540           |
| AUC                                                                                                             | 0.709       |                            |                 |                          |                          |       |        |                 |                 |
| AUC error                                                                                                       | 0.0597      |                            |                 |                          |                          |       |        |                 |                 |
| Hosmer Lemeshow test (p value)                                                                                  | 0.741       |                            |                 |                          |                          |       |        |                 |                 |
| Analysis of clinical factors associated with borderline or abnormal postoperative feeling of depression in HADS |             |                            |                 |                          |                          |       |        |                 |                 |
|                                                                                                                 | coefficient | standard error coefficient | Wald chi-square | lower 95% CI coefficient | upper 95% CI coefficient | p     | OR     | lower 95% CI OR | upper 95% CI OR |
| Intercept                                                                                                       | -0,479      | 0,795                      | 0,363           | -2,038                   | 1,079                    | 0,547 | 0,619  | 0,130           | 2,943           |
| Cystocare meeting (no vs yes)                                                                                   | -1,536      | 0,601                      | 6,532           | -2,714                   | -0,358                   | 0,011 | 0,215  | 0,066           | 0,699           |
| Marital status (single vs married)                                                                              | -0,402      | 0,506                      | 0,632           | -1,393                   | 0,589                    | 0,427 | 0,669  | 0,248           | 1,802           |
| Hospital stay (≤7 vs >7)                                                                                        | 0,847       | 0,564                      | 2,257           | -0,258                   | 1,952                    | 0,133 | 2,333  | 0,773           | 7,043           |
| Gender (male vs female)                                                                                         | 0,262       | 0,565                      | 0,216           | -0,844                   | 1,369                    | 0,642 | 1,300  | 0,430           | 3,931           |
| Age (≤65 vs > 65)                                                                                               | 0,265       | 0,537                      | 0,244           | -0,787                   | 1,318                    | 0,621 | 1,304  | 0,455           | 3,737           |
| Surgical approach (open vs laparoscopic)                                                                        | 0,134       | 0,565                      | 0,056           | -0,974                   | 1,241                    | 0,813 | 1,143  | 0,378           | 3,460           |
| Urinary diversion (ureterocutaneostomy vs ileal conduit)                                                        | 0,325       | 0,535                      | 0,369           | -0,723                   | 1,374                    | 0,543 | 1,384  | 0,485           | 3,950           |
| Complications grade (≤2 vs >2)                                                                                  | -0,363      | 0,657                      | 0,305           | -1,651                   | 0,925                    | 0,581 | 0,696  | 0,192           | 2,521           |
| AUC                                                                                                             | 0.712       |                            |                 |                          |                          |       |        |                 |                 |
| AUC error                                                                                                       | 0.0586      |                            |                 |                          |                          |       |        |                 |                 |
| Hosmer Lemeshow test (p value)                                                                                  | 0.656       |                            |                 |                          |                          |       |        |                 |                 |
| Multivariate analysis of clinical factors associated with hospital stay ≥ 7 day                                 |             |                            |                 |                          |                          |       |        |                 |                 |
|                                                                                                                 | coefficient | standard error coefficient | Wald chi-square | lower 95% CI coefficient | upper 95% CI coefficient | p     | OR     | lower 95% CI OR | upper 95% CI OR |
| Intercept                                                                                                       | 1,541       | 0,844                      | 3,334           | -0,113                   | 3,195                    | 0,068 | 4,669  | 0,893           | 24,409          |
| Cystocare meeting (no vs yes)                                                                                   | 1,144       | 0,693                      | 2,727           | -0,214                   | 2,502                    | 0,099 | 3,140  | 0,808           | 12,205          |
| Marital status (single vs married)                                                                              | -0,822      | 0,632                      | 1,693           | -2,061                   | 0,416                    | 0,193 | 0,439  | 0,127           | 1,516           |
| Gender (male vs female)                                                                                         | 0,036       | 0,668                      | 0,003           | -1,273                   | 1,344                    | 0,957 | 1,036  | 0,280           | 3,835           |
| Age (≤65 vs > 65)                                                                                               | -0,651      | 0,614                      | 1,126           | -1,854                   | 0,551                    | 0,289 | 0,521  | 0,157           | 1,736           |
| Surgical approach (open vs laparoscopic)                                                                        | -1,880      | 0,768                      | 5,991           | -3,385                   | -0,375                   | 0,014 | 0,153  | 0,034           | 0,688           |
| Urinary diversion (ureterocutaneostomy vs ileal conduit)                                                        | 0,914       | 0,627                      | 2,124           | -0,315                   | 2,143                    | 0,145 | 2,494  | 0,730           | 8,525           |
| Complications grade (≤2 vs >2)                                                                                  | 0,087       | 0,742                      | 0,014           | -1,368                   | 1,541                    | 0,907 | 1,091  | 0,255           | 4,670           |
| Postoperative depression                                                                                        |             |                            |                 |                          |                          |       |        |                 |                 |
| normal vs borderline                                                                                            | 0,087       | 0,909                      | 0,009           | -1,695                   | 1,869                    | 0,924 | 1,091  | 0,184           | 6,480           |
| normal vs abnormal                                                                                              | -0,049      | 0,903                      | 0,003           | -1,820                   | 1,721                    | 0,957 | 0,952  | 0,162           | 5,592           |
| Postoperative anxiety                                                                                           |             |                            |                 |                          |                          |       |        |                 |                 |
| normal vs borderline                                                                                            | 0,497       | 0,746                      | 0,443           | -0,966                   | 1,959                    | 0,506 | 1,643  | 0,381           | 7,090           |
| normal vs abnormal                                                                                              | 2,840       | 1,322                      | 4,617           | 0,249                    | 5,430                    | 0,032 | 17,114 | 1,283           | 228,234         |
| AUC                                                                                                             | 0.812       |                            |                 |                          |                          |       |        |                 |                 |
| AUC error                                                                                                       | 0.0488      |                            |                 |                          |                          |       |        |                 |                 |
| Hosmer Lemeshow test (p value)                                                                                  | 0.596       |                            |                 |                          |                          |       |        |                 |                 |
