# Supplementary material for: Educational and Psychological Support Combined with Minimally Invasive Surgical Technique Reduces Perioperative Depression and Anxiety in Patients with Bladder Cancer Undergoing Radical Cystectomy
Source: MDPI journal article supplement (doi:10.3390/ijerph182413071), 2021-12-11
Supplement: s1 [file s1]

**Sampling distribution before Box Cox transformation.**

|       | N  | mean  | median | mode     | min.  | max.  | lower<br>quantile | upper<br>quantile | variance | standard<br>deviation | coefficient<br>of variation | skewness | kurtosis |
|-------|----|-------|--------|----------|-------|-------|-------------------|-------------------|----------|-----------------------|-----------------------------|----------|----------|
| All   | 95 | 67,45 | 67,00  | 66,00000 | 41,00 | 89,00 | 63,00             | 73,00             | 67,10    | 8,19                  | 12,14                       | -0,34    | 0,96     |
| Arm A | 32 | 64,75 | 66,00  | 66,00000 | 41,00 | 76,00 | 61,50             | 69,50             | 68,13    | 8,25                  | 12,75                       | -0,93    | 1,16     |
| Arm B | 63 | 68,83 | 68,00  | 66,00000 | 47,00 | 89,00 | 64,00             | 74,00             | 61,99    | 7,87                  | 11,44                       | -0,01    | 0,45     |

**Sampling distribution after Box Cox transformation.**

|       | N  | mean   | median | mode     | min.   | max.    | lower<br>quantile | upper<br>quantile | variance | standard<br>deviation | coefficient<br>of variation | skewness | kurtosis |
|-------|----|--------|--------|----------|--------|---------|-------------------|-------------------|----------|-----------------------|-----------------------------|----------|----------|
| All   | 95 | 893,47 | 874,72 | 852,0697 | 371,22 | 1435,37 | 785,65            | 1015,89           | 34174,72 | 184,86                | 20,69                       | 0,03     | 0,65     |
| Arm A | 32 | 832,62 | 852,07 | 852,0697 | 371,22 | 1089,82 | 753,33            | 932,48            | 30895,28 | 175,77                | 21,11                       | -0,62    | 0,45     |
| Arm B | 63 | 924,38 | 897,62 | 852,0697 | 471,18 | 1435,37 | 807,53            | 1040,29           | 33484,05 | 182,99                | 19,80                       | 0,29     | 0,40     |
